# Supplementary material for: Investigation into fiber formation in N-alkyl urea peptoid oligomers and the synthesis of a water-soluble PEG/N-alkyl urea peptoid oligomer conjugate
Source: Royal Society of Chemistry journal article supplement (doi:10.1039/c1py00284h), 2011-01-01
Supplement: c1py00284h.pdf [file c1py00284h.pdf]

Supporting Information

***N*-alkyl urea peptoid oligomers and its polymer conjugate form fibers in solutions**

Xiaoping Chen, Keyang Ding, and Neil Ayres\*

Department of Chemistry, The University of Cincinnati, PO Box 210172, Cincinnati, Ohio 45221

**Supporting Information**

Contents:

|                                                                                                                                                                                                                                                                                                                                                                                                 |               |
|-------------------------------------------------------------------------------------------------------------------------------------------------------------------------------------------------------------------------------------------------------------------------------------------------------------------------------------------------------------------------------------------------|---------------|
| <b>Figure S1</b> SEM images of (a) measurement of the diameter of a single fiber of <b>1</b> in DMF and (b) measurement of the diameter of a single fiber formed from compound <b>3</b> in H <sub>2</sub> O                                                                                                                                                                                     | <b>S2-S3</b>  |
| <b>Figure S2.</b> (a) NOESY spectrum of compound <b>1</b> in CD <sub>2</sub> Cl <sub>2</sub> ; (b) magnification of the coupling of -N-CH <sub>2</sub> - and -N-CH <sub>3</sub> groups on urea-peptoid backbone; (c) NOESY spectrum of compound <b>1</b> in CD <sub>2</sub> Cl <sub>2</sub> at concentration of 4 mg/ml; (d) NOESY spectrum of compound <b>1</b> in <i>d</i> <sub>6</sub> -DMSO | <b>S4-S7</b>  |
| <b>Figure S3.</b> UV-Vis absorption spectrum of compound <b>1</b> at a various concentration                                                                                                                                                                                                                                                                                                    | <b>S8</b>     |
| <b>Figure S4.</b> Variable temperature <sup>1</sup> H NMR spectra of oligomer <b>8</b>                                                                                                                                                                                                                                                                                                          | <b>S8</b>     |
| <b>Figures S5-S10.</b> <sup>1</sup> H NMR, <sup>13</sup> C NMR and MS spectra for compounds <b>2-3</b>                                                                                                                                                                                                                                                                                          | <b>S9-S11</b> |
| <b>Figure S11.</b> <sup>1</sup> H NMR of PEG conjugates <b>4</b>                                                                                                                                                                                                                                                                                                                                | <b>S12</b>    |
| <b>Figure S12.</b> <sup>1</sup> H NMR of PEG conjugates <b>5</b>                                                                                                                                                                                                                                                                                                                                | <b>S12</b>    |
| <b>Figure S13.</b> SEM image of fibers resulting from the self-assembly of conjugate <b>5</b> in water at lower magnification                                                                                                                                                                                                                                                                   | <b>S13</b>    |
| <b>Figure S14.</b> Diameters of fibers resulting from the self-assembly of conjugate <b>5</b> in water                                                                                                                                                                                                                                                                                          | <b>S13</b>    |

Supporting Information

a

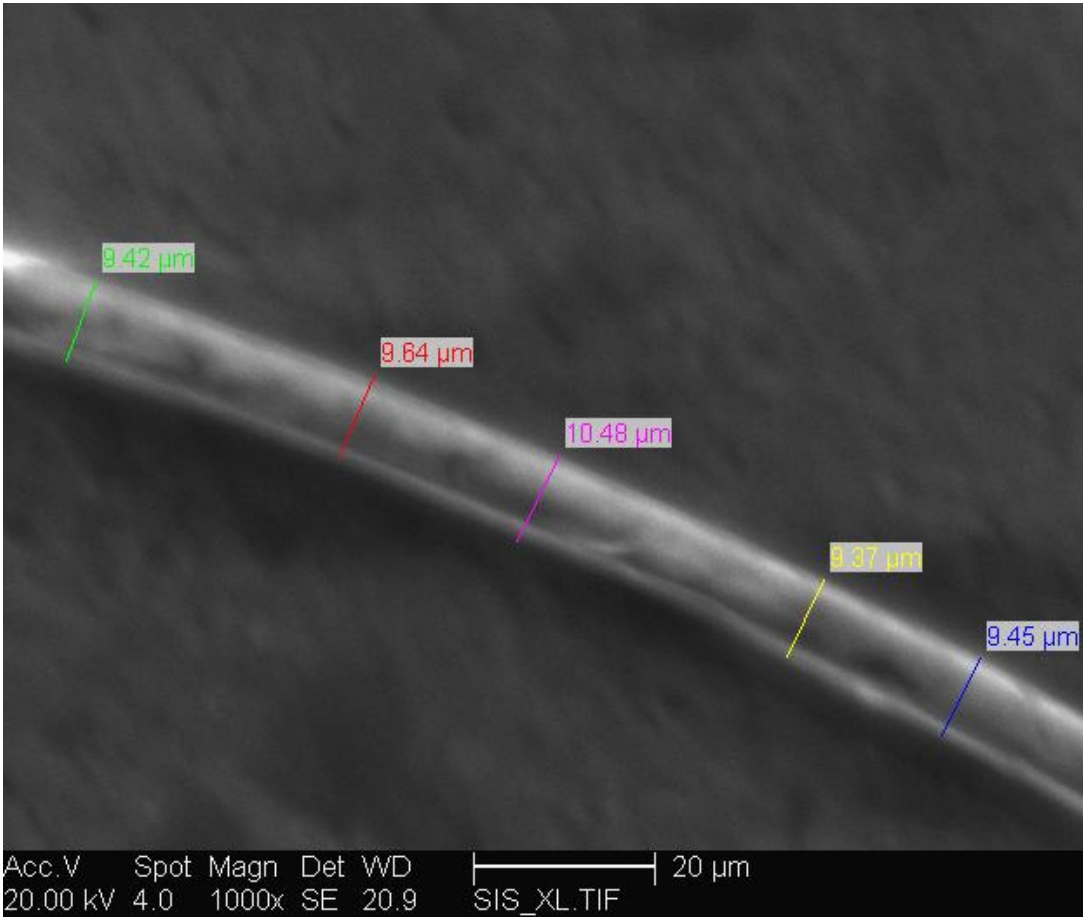

Supporting Information

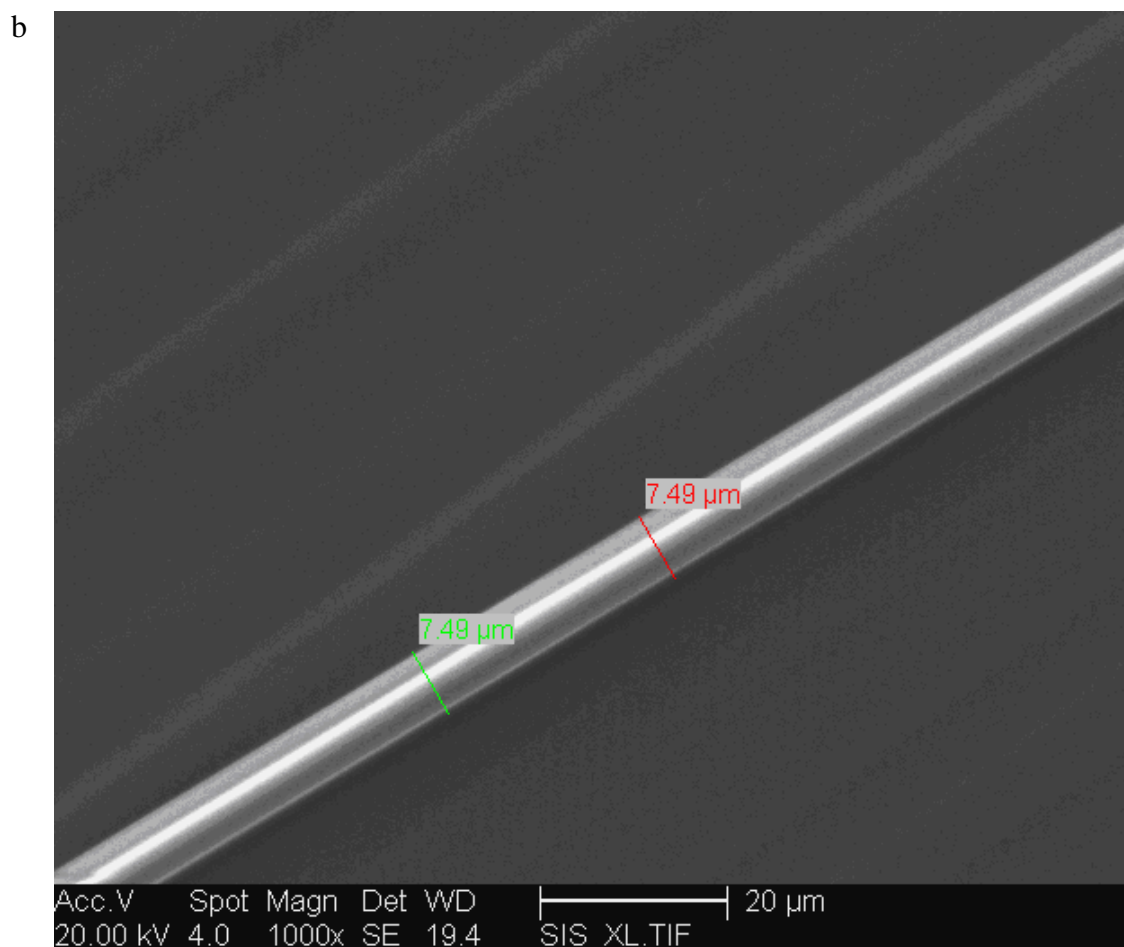

**Figure S1** SEM images of (a) measurement of the diameter of a single fiber of **1** in DMF and (b) measurement of the diameter of a single fiber formed from compound **3** in H<sub>2</sub>O.

**NOESY Spectra**

Compound **1** was dissolved in CD<sub>2</sub>Cl<sub>2</sub> at a concentration of 10 mg/ml (7.7 μM) in a sealed NMR tube. An equimolar amount of ethyl acetate to **1** was added to the NMR tube purposely to test the stability of the hydrogen bonding between molecules. No effect was seen. The full NOESY spectrum of compound **1** was shown in Figure S2a.



Supporting Information

b

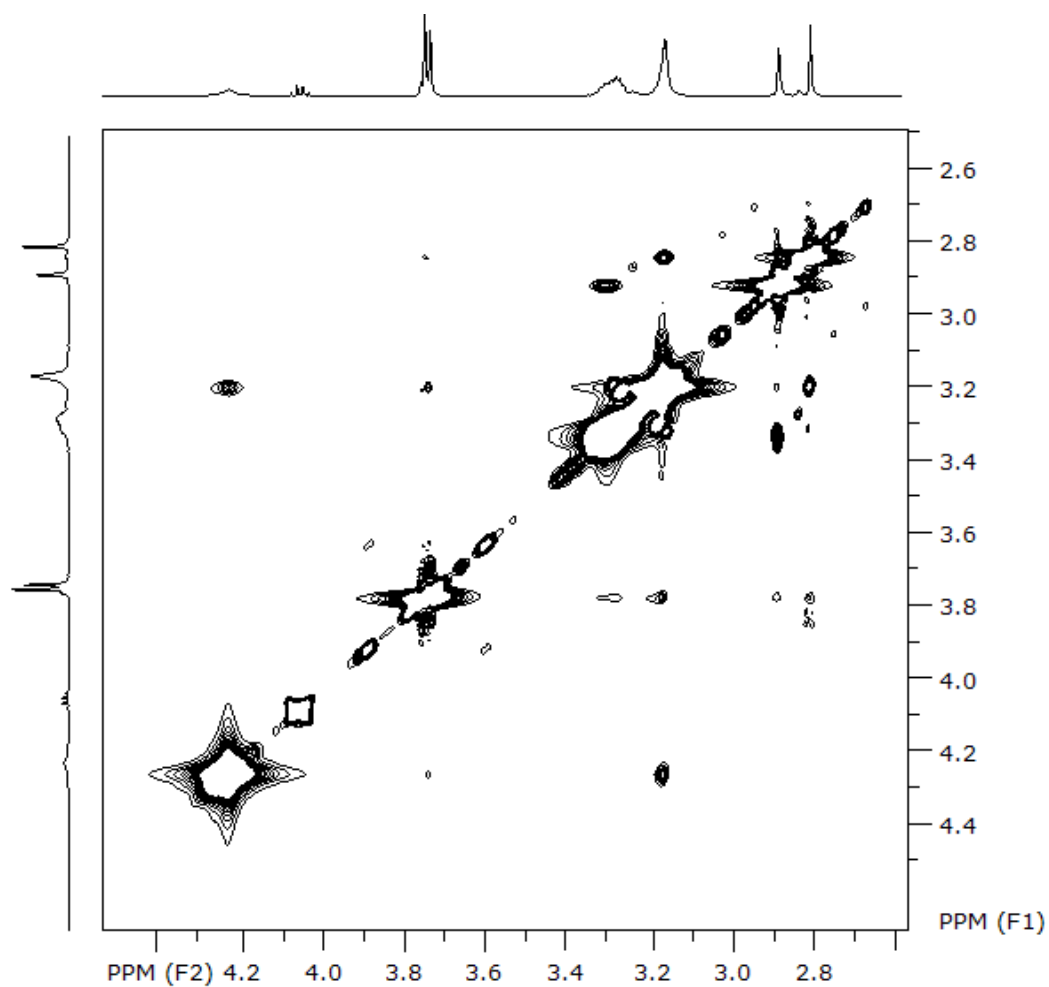

Supporting Information

c

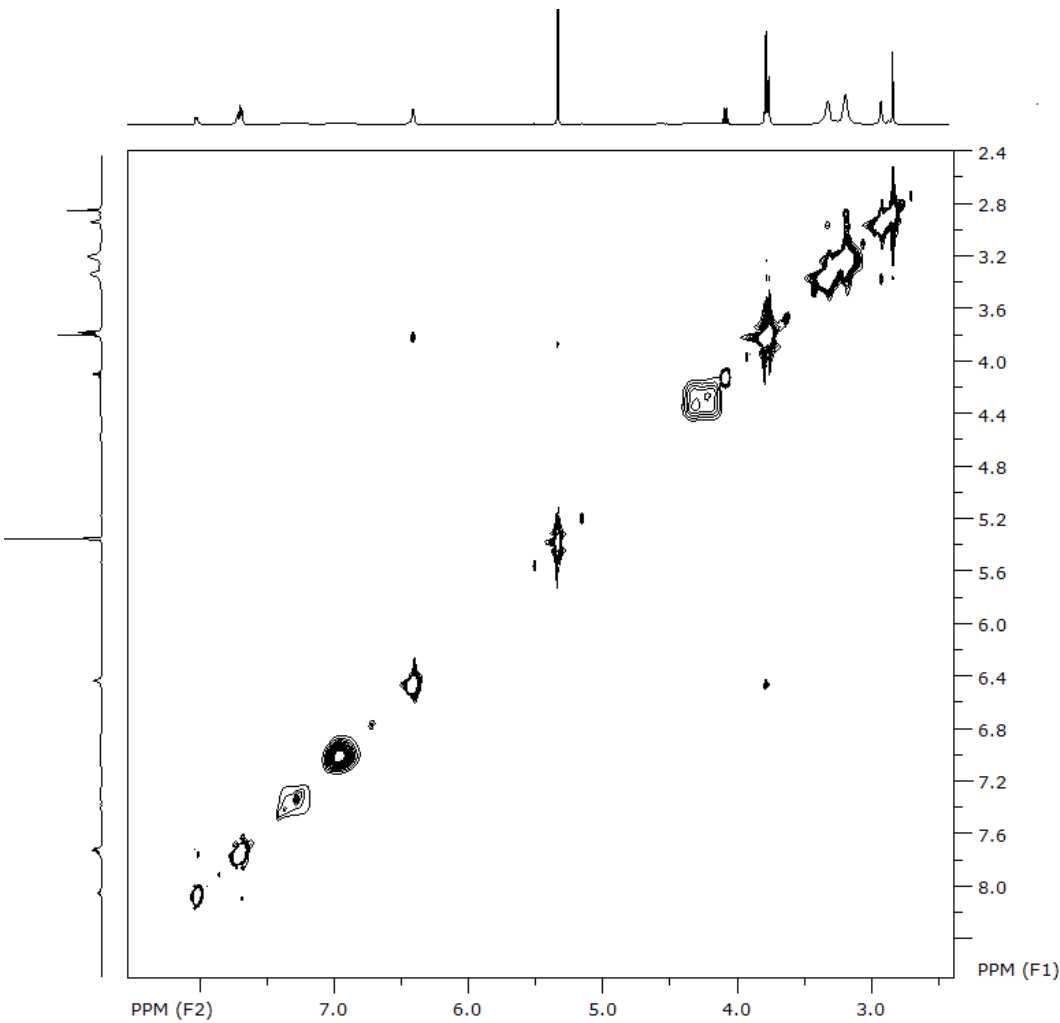

Supporting Information

d

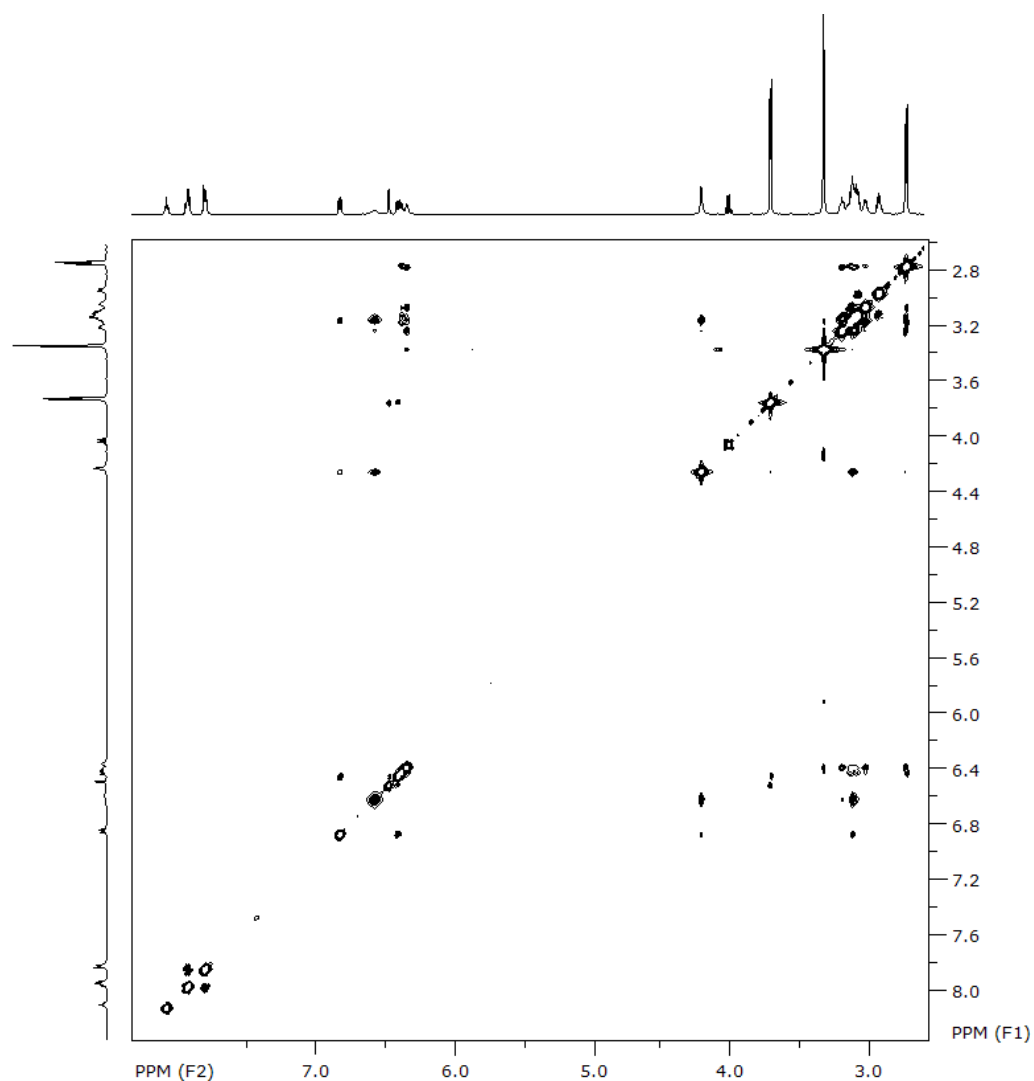

**Figure S2.** (a) NOESY spectrum of compound **1** in CD<sub>2</sub>Cl<sub>2</sub>; (b) magnification of the coupling of -N-CH<sub>2</sub>- and -N-CH<sub>3</sub> groups on urea-peptoid backbone; (c) NOESY spectrum of compound **1** in CD<sub>2</sub>Cl<sub>2</sub> at concentration of 4 mg/ml; (d) NOESY spectrum of compound **1** in *d*<sub>6</sub>-DMSO

Supporting Information

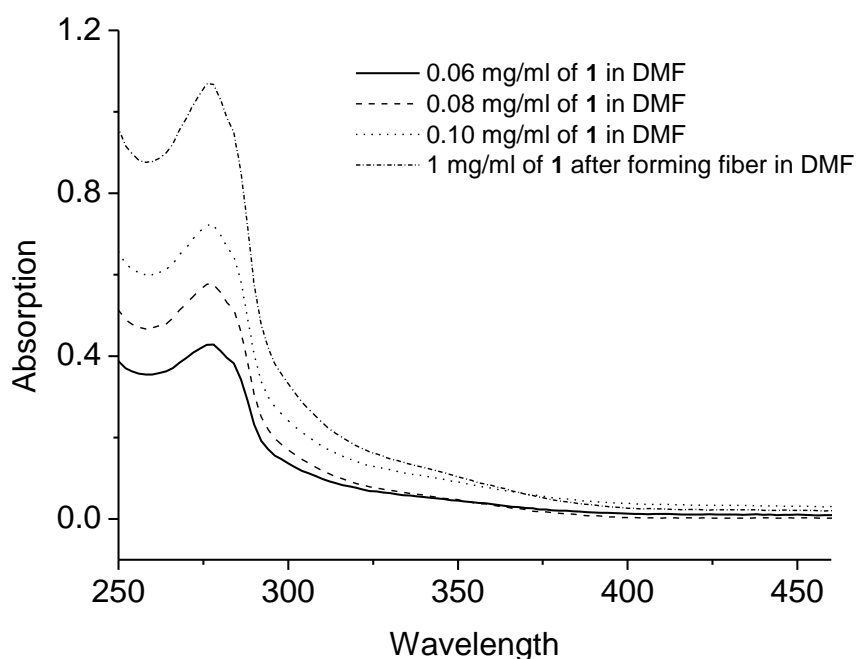

**Figure S3.** UV-Vis absorption spectrum of urea-peptoid **1** at various concentrations. The absorption of the same solution decreased after forming fiber because of the concentration decreased since **1** formed fibers and fibers were out of solution.

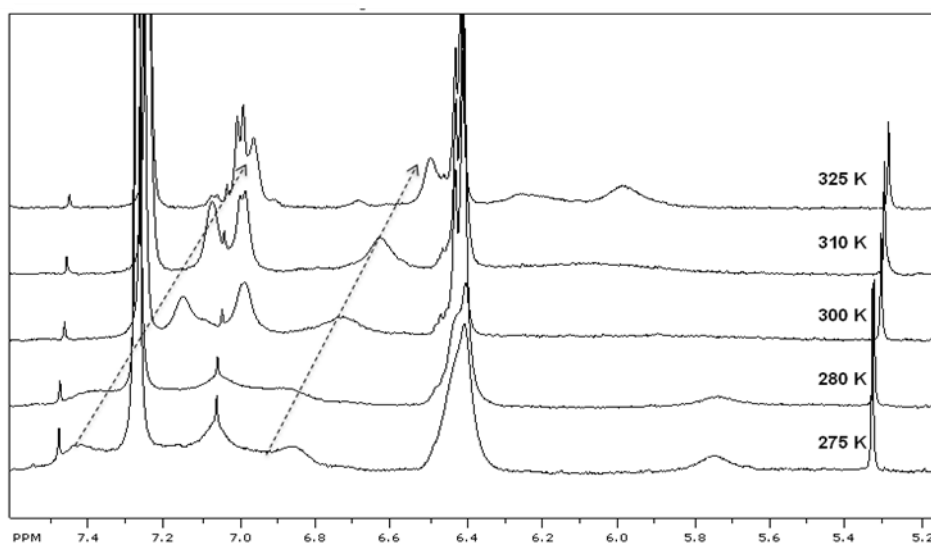

**Figure S4.** Variable temperature <sup>1</sup>H NMR spectra of oligomer **8** in CDCl<sub>3</sub> at 275 (bottom spectrum), 280, 300, 310, and 325 K (top spectrum). Dashed arrows have been added to guide the eye.





## Supporting Information

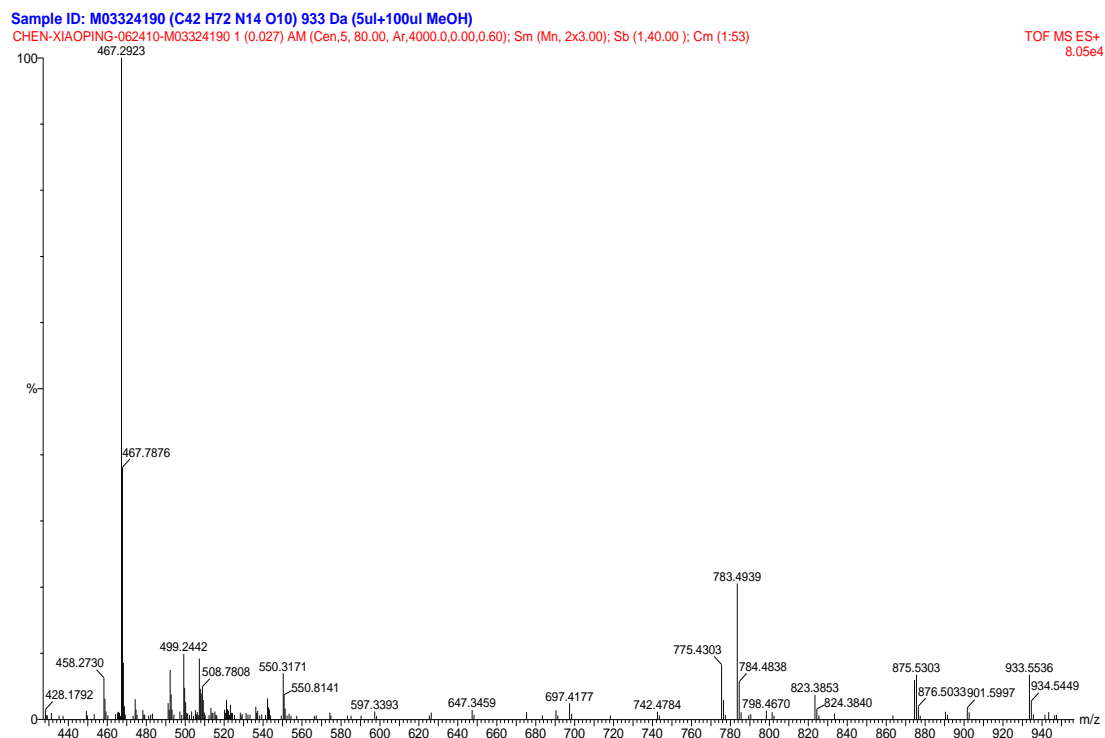

**Figure S7. Mass Spectrum of Compound 2**

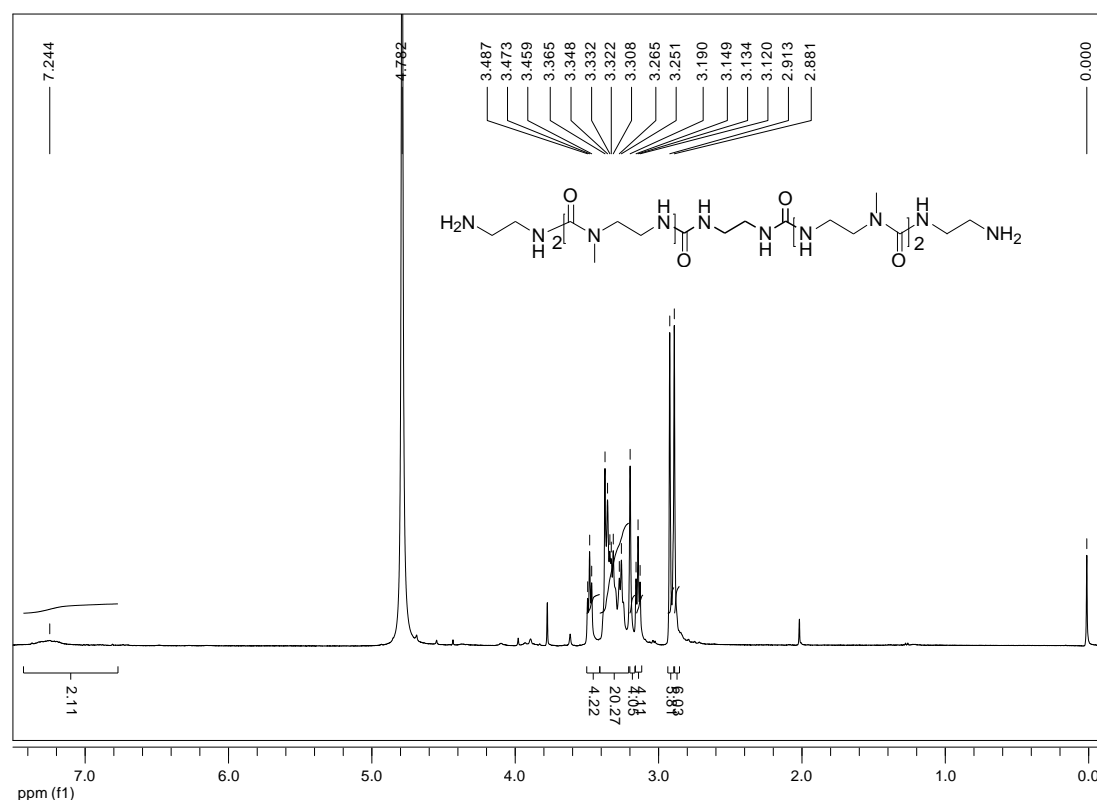

**Figure S8. <sup>1</sup>H NMR of Compound 3**

# Supporting Information

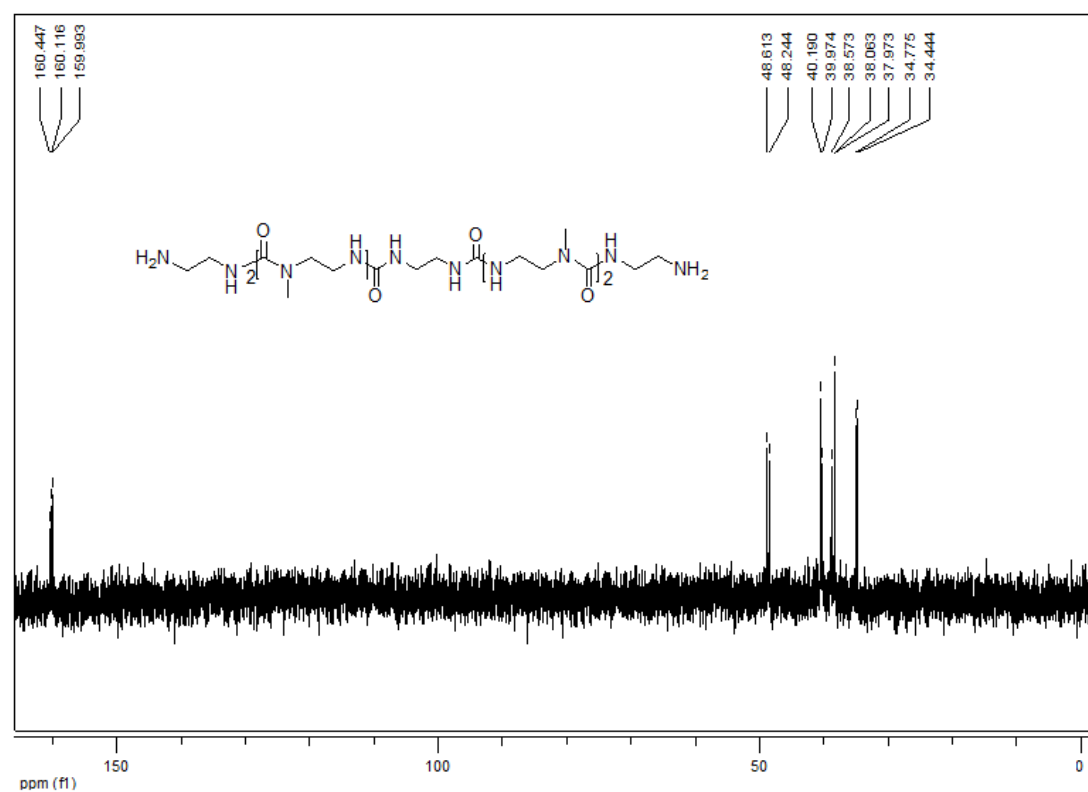

**Figure S9.** <sup>13</sup>C NMR of Compound 3

Sample ID: M03324190 XPII069 (C24 H52 N14 O6) 632 Da (in MeOH/NaI)

CHEN-XIAOPING-070810-M03324190-XPII069-R2 30 (0.574) AM (Cen,5, 80.00, Ar,4000.0,0.00,0.60); Sm (Mn, 2x3.00); Sb (1,40.00); Cm (1:53)

TOF MS ES+  
4.95e4

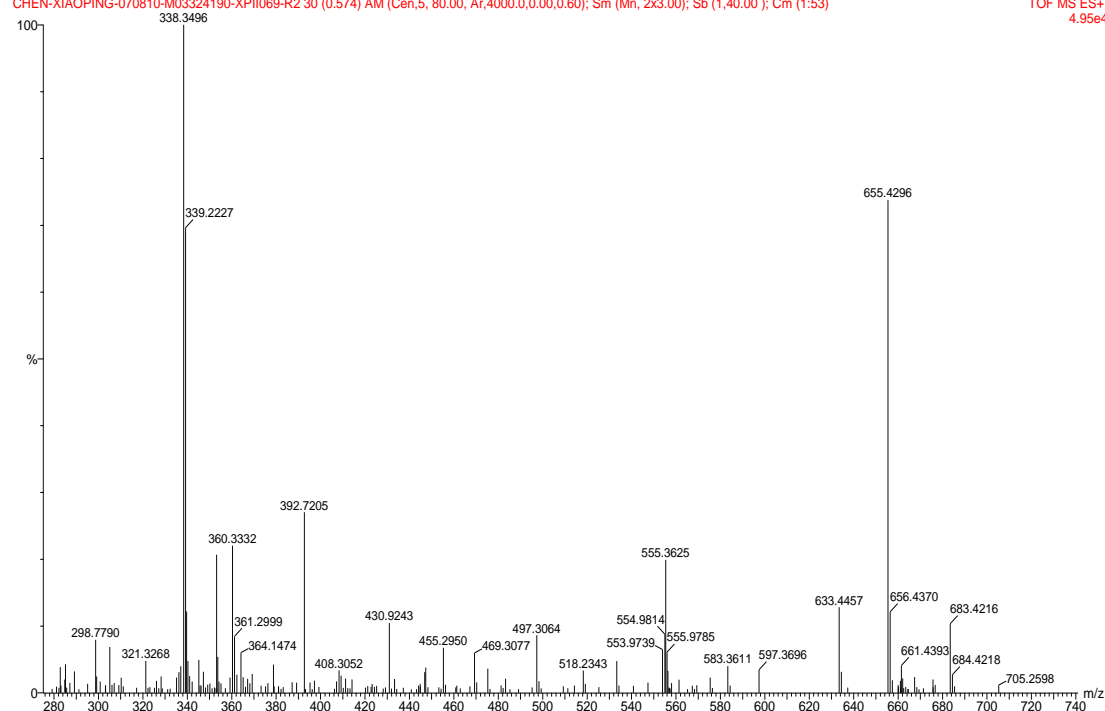

**Figure S10.** Mass Spectrum of Compound 3

Supporting Information

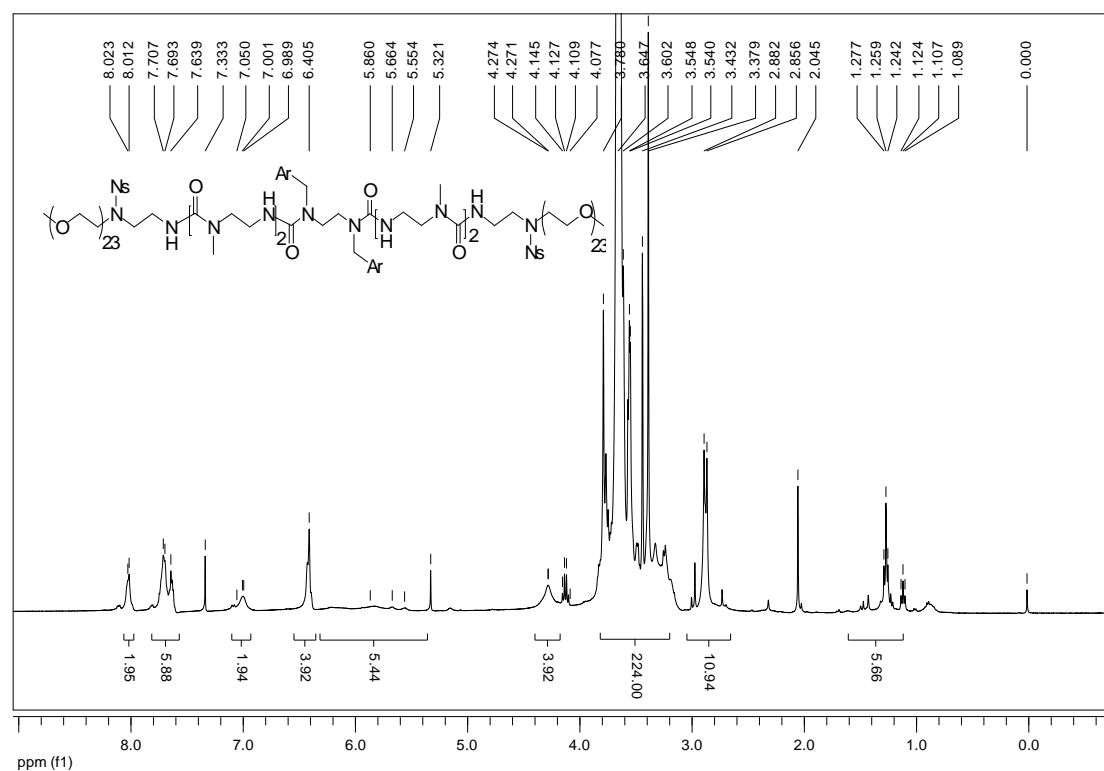

**Figure S11. <sup>1</sup>H NMR of PEG conjugates 4**

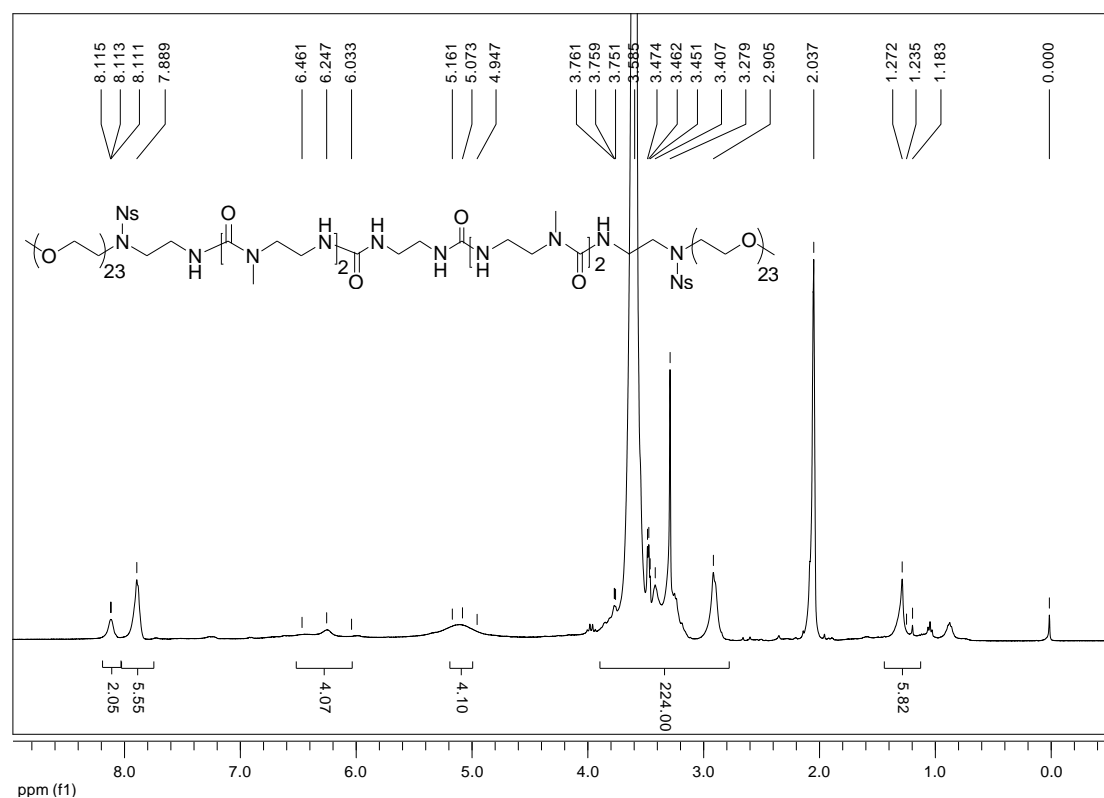

**Figure S12. <sup>1</sup>H NMR of PEG conjugates 5**

Supporting Information

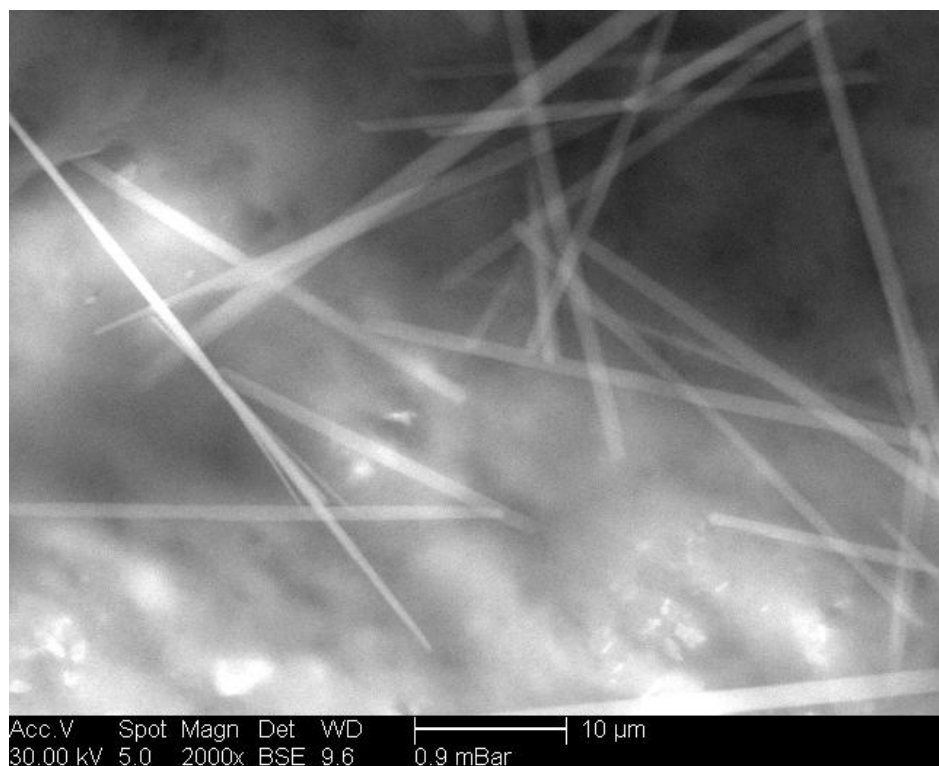

**Figure S13.** SEM image of fibers resulting from the self-assembly of conjugate **5** in water at lower magnification.

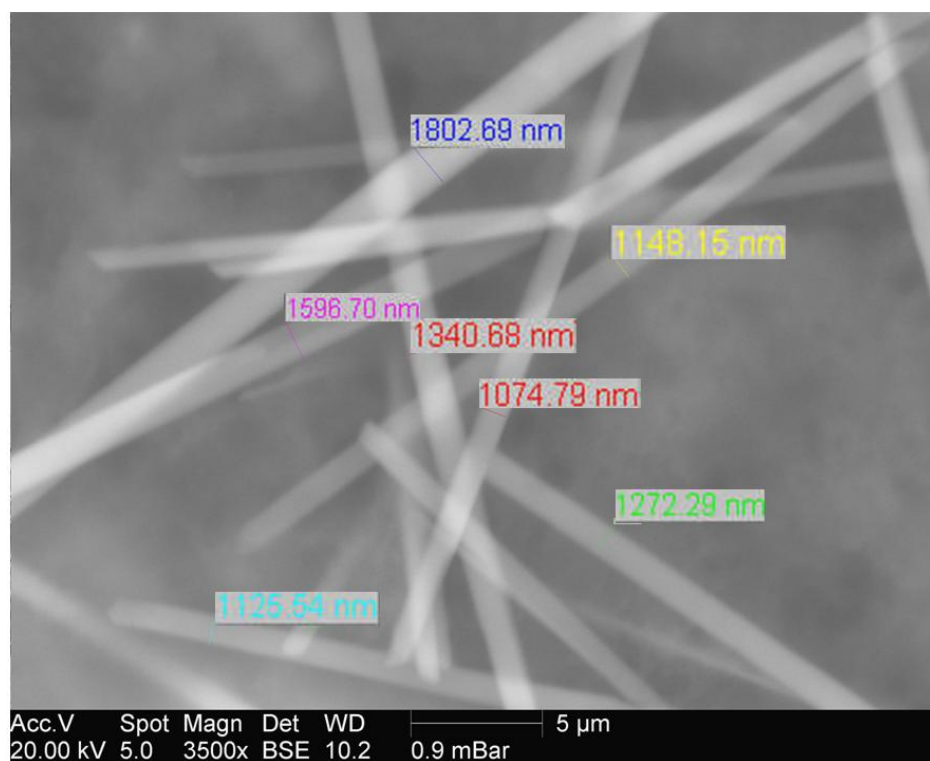

**Figure S14.** Diameters of fibers resulting from the self-assembly of conjugate **5** in water.
